# Supplementary material for: Bioinformatics analyses of gene expression profile to identify pathogenic mechanisms for COVID-19 infection and cutaneous lupus erythematosus
Source: Front Immunol. 2023 Oct 31;14:1268912. doi: 10.3389/fimmu.2023.1268912 (PMC10644101; doi:10.3389/fimmu.2023.1268912)
Supplement: Supplementary file 4 [file Table_4.xlsx]

## Sheet: Sheet1
#install.packages("pheatmap")
setwd("C:\\Users\\Administrator\\Desktop\\生信资料\\皮肤狼疮数据集\\王斌师兄整理好数据gse109248\\热图")
rt=read.table("diffExp.txt",sep="\t",header=T,row.names=1,check.names=F)
rt=rt[1:nrow(rt),] #选择所有的差异基因画热图
#rt=rt[1:50,] #选择前50个基因
library(pheatmap)
annotation=read.table("group.txt",sep="\t",header=T,row.names=1)
tiff(file="heatmap1.tiff",width = 15,height = 35,units ="cm",compression="lzw",bg="white",res=500)
pheatmap(rt, annotation=annotation,fontsize_row=7,fontsize_col=10)
dev.off()
tiff(file="heatmap2.tiff",width = 15,height = 35,units ="cm",compression="lzw",bg="white",res=500)
pheatmap(rt, annotation=annotation, color = colorRampPalette(c("green", "black", "red"))(50),fontsize_row=8,fontsize_col=10)
dev.off()
tiff(file="heatmap3.tiff",width = 15,height = 35,units ="cm",compression="lzw",bg="white",res=500)
pheatmap(rt, annotation=annotation, display_numbers = TRUE,fontsize_row=8,fontsize_col=10)
dev.off()
tiff(file="heatmap4.tiff",width = 15,height = 35,units ="cm",compression="lzw",bg="white",res=500)
pheatmap(rt, annotation=annotation, cluster_cols = FALSE,fontsize_row=8,fontsize_col=10)
dev.off()
#the agglomeration method to be used. This should be (an unambiguous abbreviation of) one of "ward.D",
# "ward.D2", "single", "complete", "average" (= UPGMA), "mcquitty" (= WPGMA), "median" (= WPGMC) or "centroid" (= UPGMC).
tiff(file="heatmap5.tiff",width = 15,height = 35,units ="cm",compression="lzw",bg="white",res=500)
pheatmap(rt, annotation=annotation, clustering_method = "median",fontsize_row=8,fontsize_col=10)
dev.off()
#差异表达基因的热图
library(pheatmap)
DEG_exp<-read.table("diffExp.txt", sep='\t',header=T,row.names=1)
png(file="Pheatmap.png",res=300,units='in',width=20,height=35)
pheatmap(DEG_exp,color=colorRampPalette(c("green","black","red"))(100),fontsize_row=20,fontsize_col=20,scale="row",border_color=NA)
dev.off()
